# Supplementary material for: Single-nucleus transcriptional and chromatin accessibility analyses of maturing mouse Achilles tendon uncover the molecular landscape of tendon stem/progenitor cells
Source: eLife. 2026 Feb 2;14:RP104768. doi: 10.7554/eLife.104768 (PMC12863719; doi:10.7554/eLife.104768)
Supplement: Supplementary file 17. [file elife-104768-supp17.xlsx]

## Sheet: Sheet1
Gene	Forward primer (5'-3')	Reverse primer (5'-3')
Cd55	ACAGTTAAAGTTTCAGCAACCCA	ATCCACTGACCTGTGTTAGGC
Cd248	GCTATCGCTGGGTCACACAT	ATCCCACAAAGGGGCATCTG
Cd34	CTACAGGAGAAAGGCTGGAGCTG	ATCTGGTAAGCAGGGTTGTGAG
Ly6a	ATCTGTGCAGCCCTTCTCTG	ACTCCAGTCCCTGAGCTCTT
Tppp3	GGTAGAAGCCGGGTGGCAT	CATTCATCTCTTGCCCGCTG
Pdgfra	GGAACCTCAGAGAGAATCGGC	CATAGCTCCTGAGACCCGCTG
Klf3	GCTTGGCAGAGCCAGACA	AATTCGACGGGAAGGACACC
Klf4	TGTGACTATGCAGGCTGTGG	AGTGCCTGGTCAGTTCATCG
Creb5	GGCACAAGCACGAGATGACT	TGCTCAAAGGAGCAGTCCAG
Mkx	ACAGTAAGTGCCTTGCTCCC	TGGACCAGTGGGAATGATGC
Scx	GAGAACACCCAGCCCAAACA	TGTCACGGTCTTTGCTCAAC
Col1a1	CGATGGATTCCCGTTCGAGT	GAGGCCTCGGTGGACATTAG
Creb3l1	GCTCGATGACCCAGATCCAG	TACTCCTTCTTCTTGCGGCG
Sox9	CCCAAAACCGACGTGCAAGC	ACGTCGCTGCTCAGTTCACC
Runx2	ATCCCCATCCATCCACTCCA	GCCAGAGGCAGAAGTCAGAG
Col2a1	CGGTCCTACGGTGTCAGGG	AGATGCGGCAAGATGAGGG
Alpl	TGGGCCTGCTCTGTTTCTTC	TGTACCCTGAGATTCGTCCCT
